# Supplementary material for: Highly efficient electrosynthesis of hydrogen peroxide on a superhydrophobic three-phase interface by natural air diffusion
Source: PubMed Central journal article supplement (PMC7138826; doi:10.1038/s41467-020-15597-y), 2020-04-07
Supplement: 41467_2020_15597_MOESM1_ESM.pdf [file 41467_2020_15597_MOESM1_ESM.pdf]

Supplementary Information for

**Highly efficient electrosynthesis of hydrogen peroxide on a superhydrophobic  
three-phase interface by natural air diffusion**

Zhang *et al.*

## Supplementary Figures

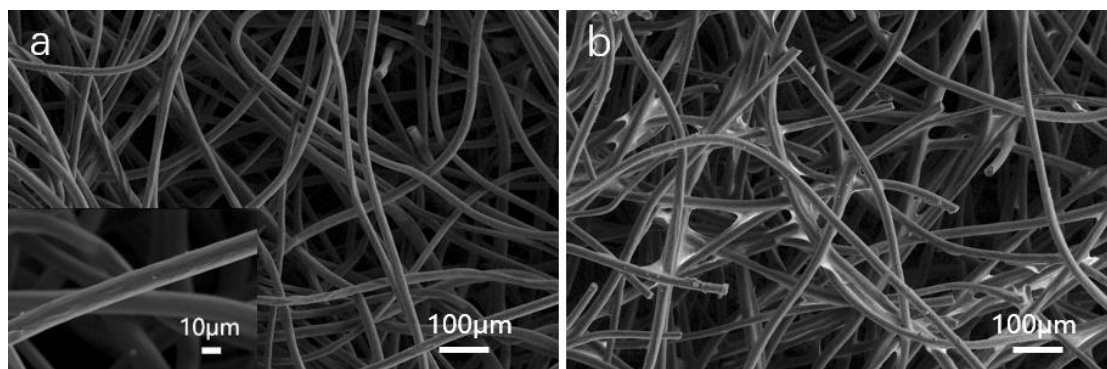

**Supplementary Figure 1.** SEM images of CF, with insert shows fibers (a) before and (b) after modification with PTFE suspension.

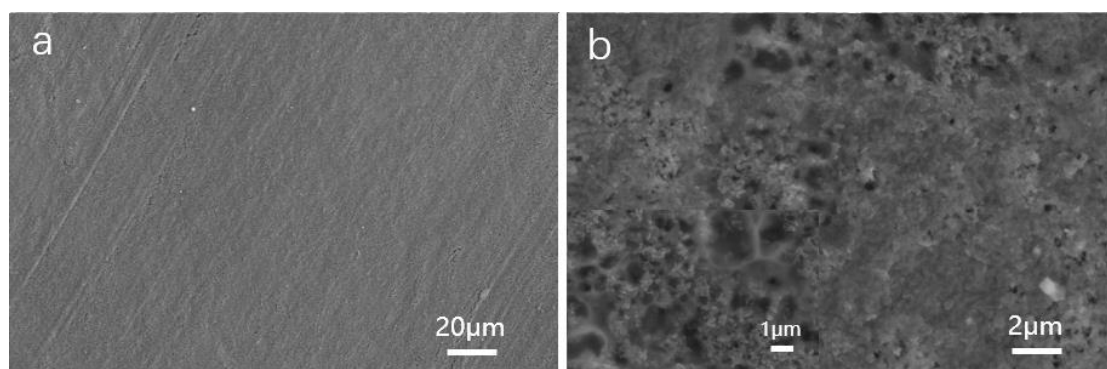

**Supplementary Figure 2.** SEM images of (a) traditional GDE diffusion layer and (b) magnified view of the tunnel.

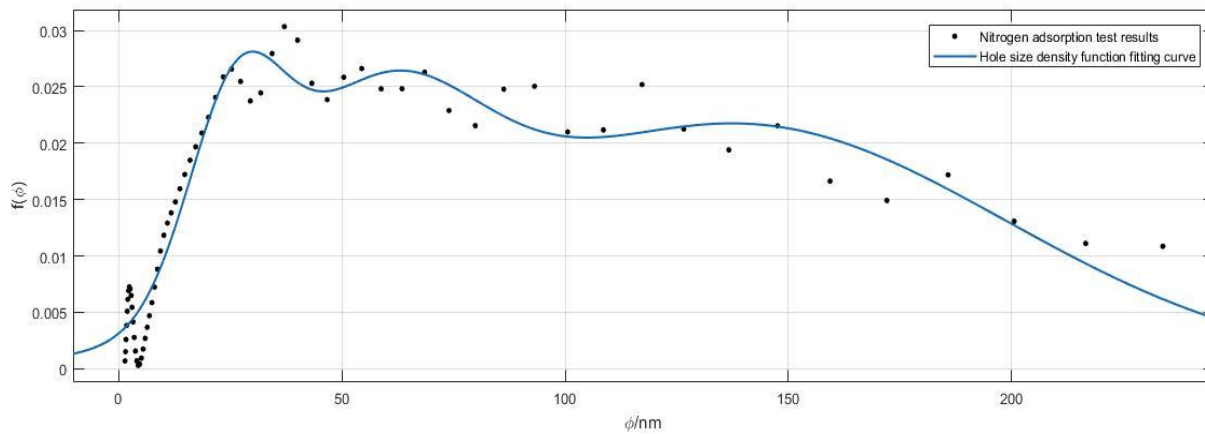

**Supplementary Figure 3.** Diffusion layer pore size distribution of traditional GDE.

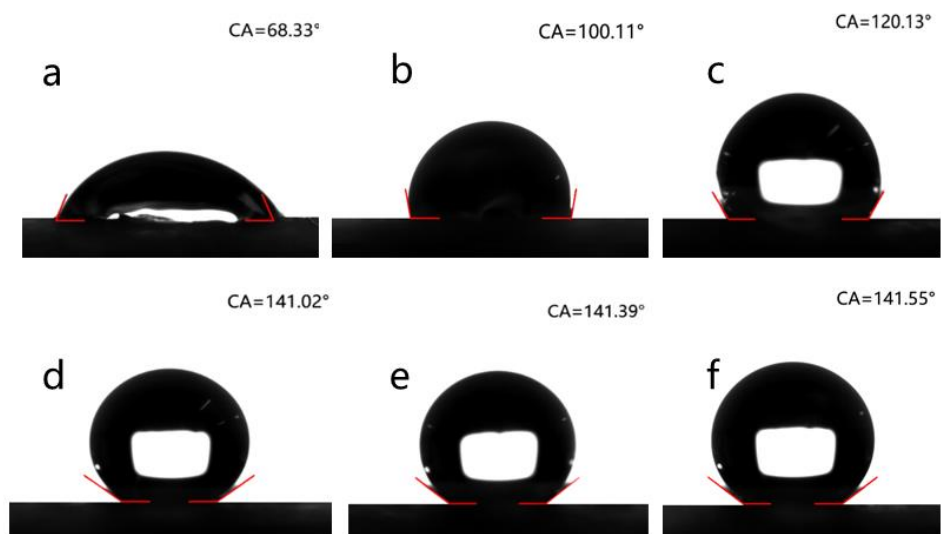

**Supplementary Figure 4.** Photographs of contact angle of catalytic layers with (a) PTFE / CB =0.1; (b) PTFE / CB =0.2; (c) PTFE / CB =0.3; (d) PTFE / CB =0.6; (e) PTFE / CB =1; (f) PTFE / CB =1.5.

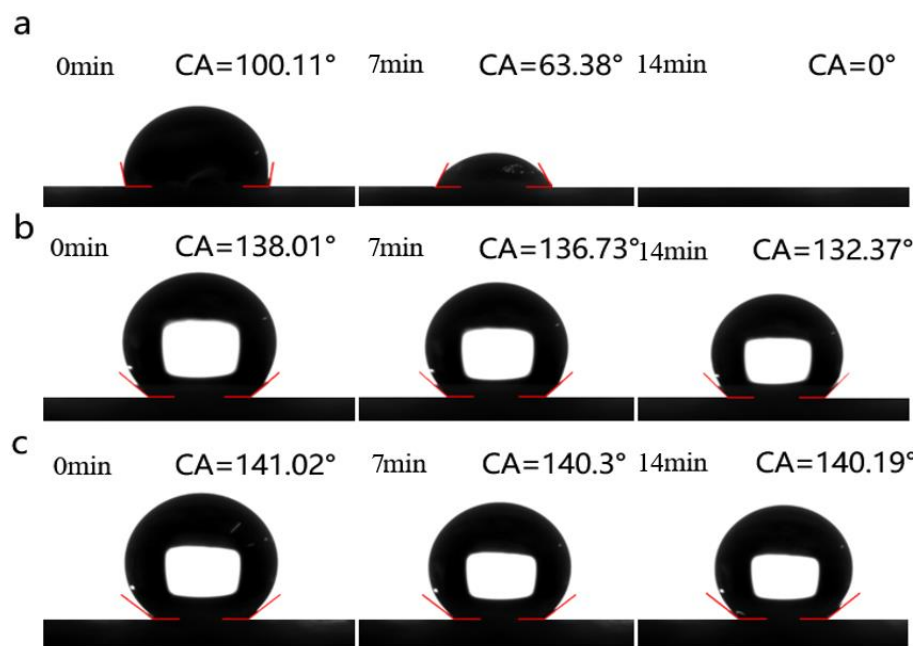

**Supplementary Figure 5.** Photographs of the contact angle of the catalytic layers as a function of time with (a) PTFE / CB =0.2; (b) PTFE / CB =0.5; (c) PTFE / CB =0.6.

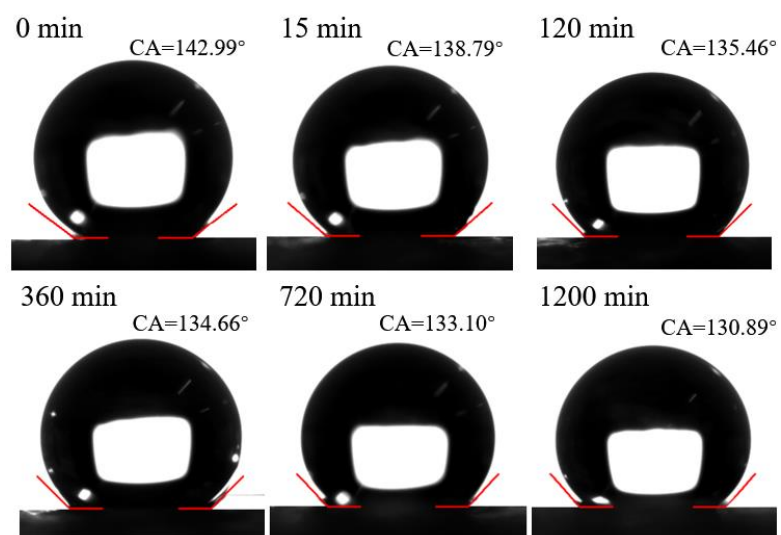

**Supplementary Figure 6.** Photographs of the contact angle of the catalytic layer (PTFE / CB =0.6) as a function of electrolysis time at the applied current density of  $60 \text{ mA cm}^{-2}$ .

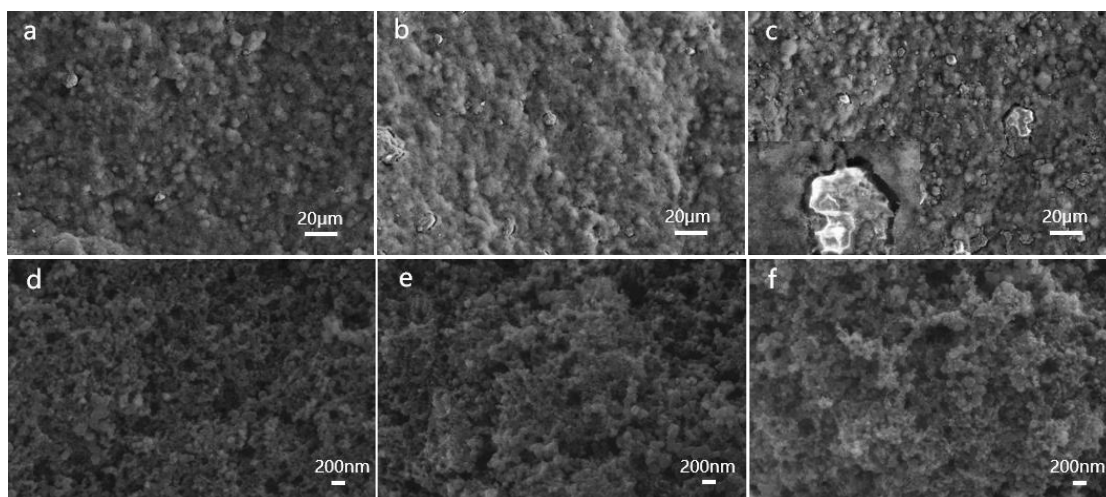

**Supplementary Figure 7.** SEM images of catalytic layers with (a) PTFE / CB =0.1; (b) PTFE / CB =0.6 and (c) PTFE / CB =1.5 at low magnification; SEM images of PTFE/carbon black mixture with (d) PTFE / CB =0.1; (e) PTFE / CB =0.6 and (f) PTFE / CB =1.5 at high magnification.

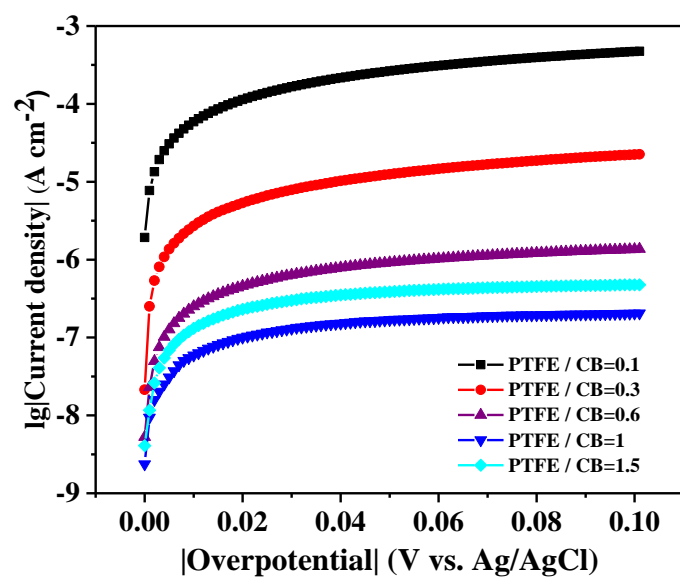

**Supplementary Figure 8.** Tafel plot of catalytic layer materials with different PTFE/CB mass ratio.

Source data are provided as a Source Data file.



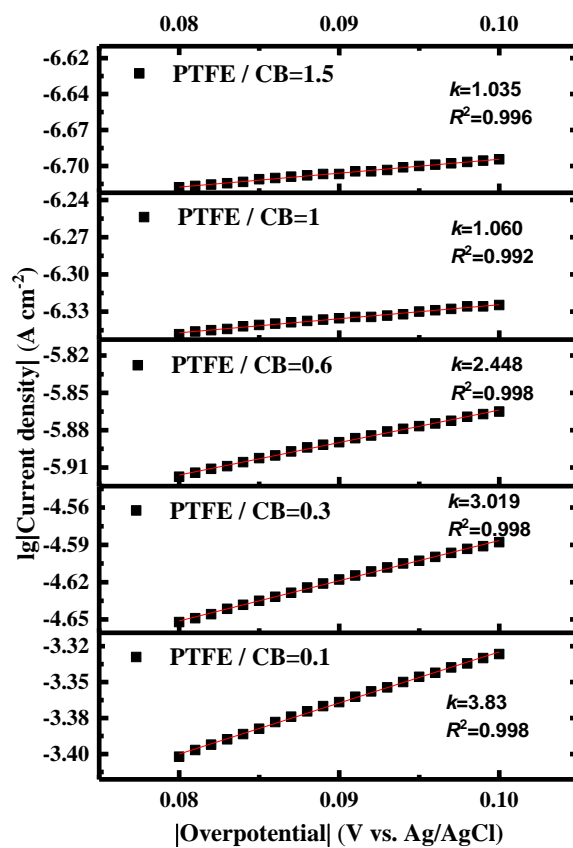

Supplementary Figure 9. The linear fit for the Tafel plots of the overpotential from 80 to 100 mV.

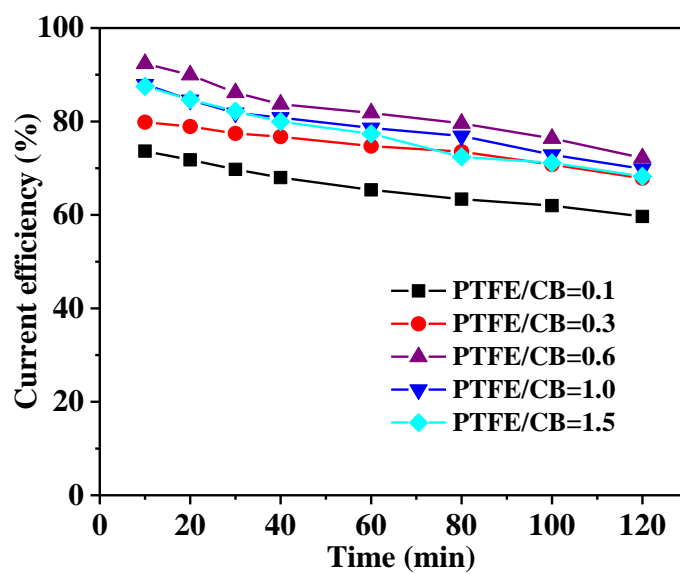

**Supplementary Figure 10.** Current efficiency of different PTFE/CB NADEs as function of electrolysis time at the current density of  $60 \text{ mA cm}^{-2}$ . Source data are provided as a Source Data file.

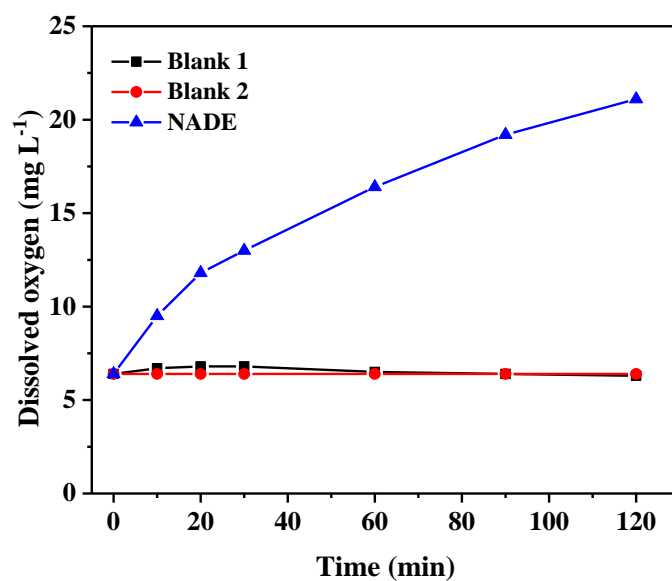

**Supplementary Figure 11.** Change of dissolved oxygen concentration with electrolysis time in different systems. Blank 1 was the system shown in Fig. 4a-C with almost no generation of H<sub>2</sub>O<sub>2</sub> which measured the contribution of oxygen produced by the anodic oxidation to the change in DO; Blank 2 was NADE system without voltage applied which measured the contribution of naturally diffused oxygen to the change in DO. Source data are provided as a Source Data file.

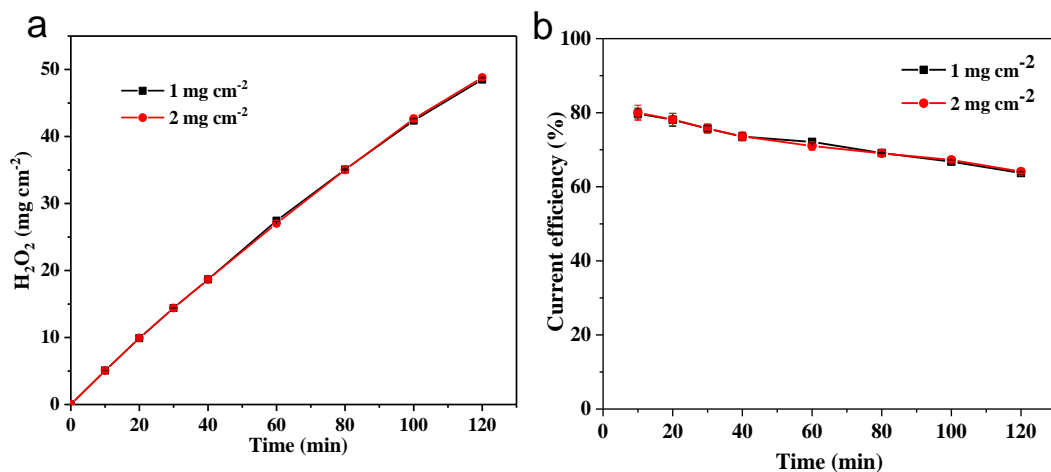

**Supplementary Figure 12.** (a) The production of H<sub>2</sub>O<sub>2</sub> and (b) current efficiency under the current density of 60 mA cm<sup>-2</sup> with different loadings of catalyst. Source data are provided as a Source Data file.

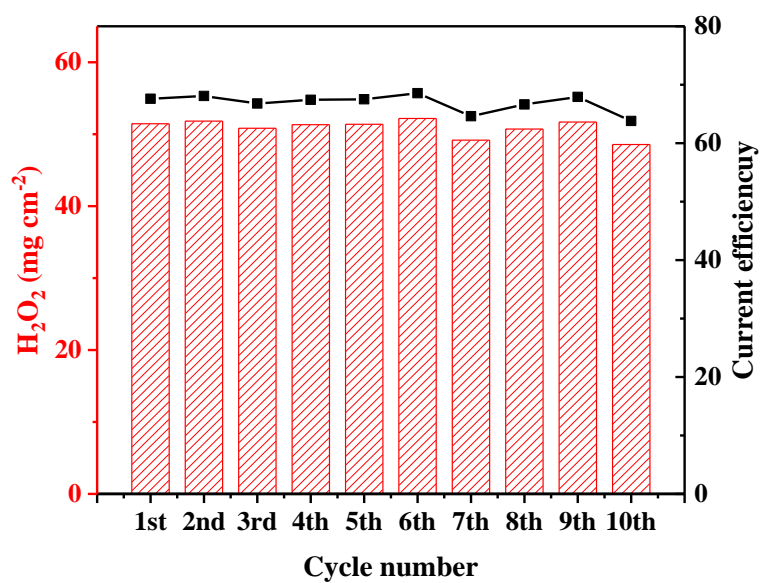

**Supplementary Figure 13.** The stability test of the NADE with the catalyst loading of 1 mg cm<sup>-2</sup> in 10-times (20 h) continuous runs. Source data are provided as a Source Data file.

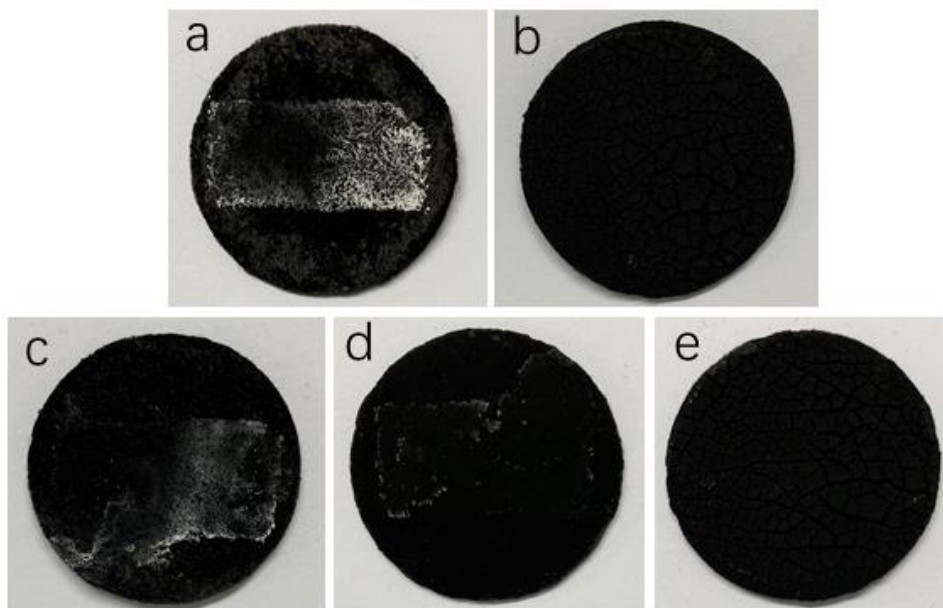

**Supplementary Figure 14.** The Photographs of used NADEs with different catalyst loadings. (a) NADE with catalyst loading of  $1 \text{ mg cm}^{-2}$  after running 10 times (20 h) at the current density of  $60 \text{ mA cm}^{-2}$ ; (b) NADE with catalyst loading of  $13.2 \text{ mg cm}^{-2}$  after running 10 times (20 h) at the current density of  $60 \text{ mA cm}^{-2}$ ; NADE with catalyst loadings of (c)  $2 \text{ mg cm}^{-2}$ ; (d)  $4.4 \text{ mg cm}^{-2}$ ; (e)  $8.8 \text{ mg cm}^{-2}$  after running 2 h at the current density of  $200 \text{ mA cm}^{-2}$ .

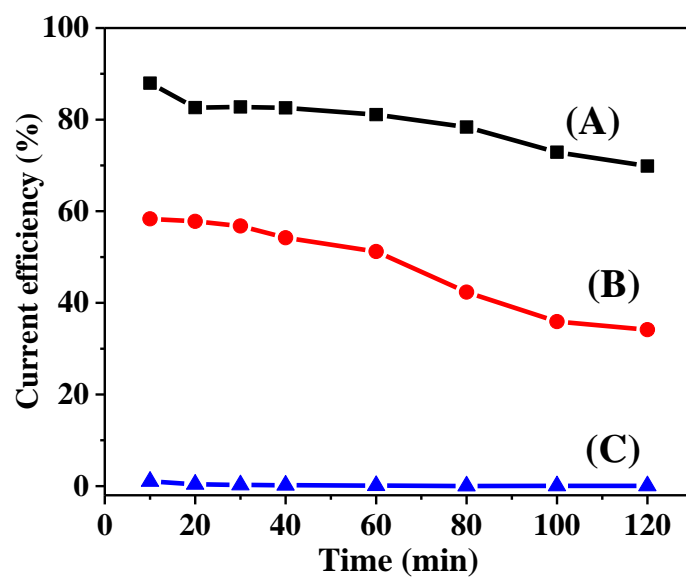

**Supplementary Figure 15.** The current efficiency of  $\text{H}_2\text{O}_2$  production by different systems under 60  $\text{mA cm}^{-2}$  current density. Source data are provided as a Source Data file.

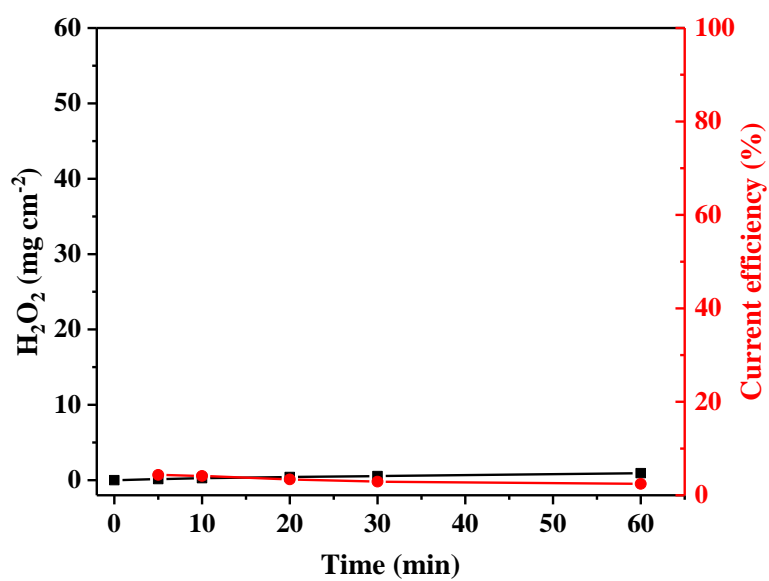

**Supplementary Figure 16.** The production of H<sub>2</sub>O<sub>2</sub> and current efficiency of the carbon felt substrate without loading catalytic layer under the current density of 60 mA cm<sup>-2</sup>. Source data are provided as a Source Data file.



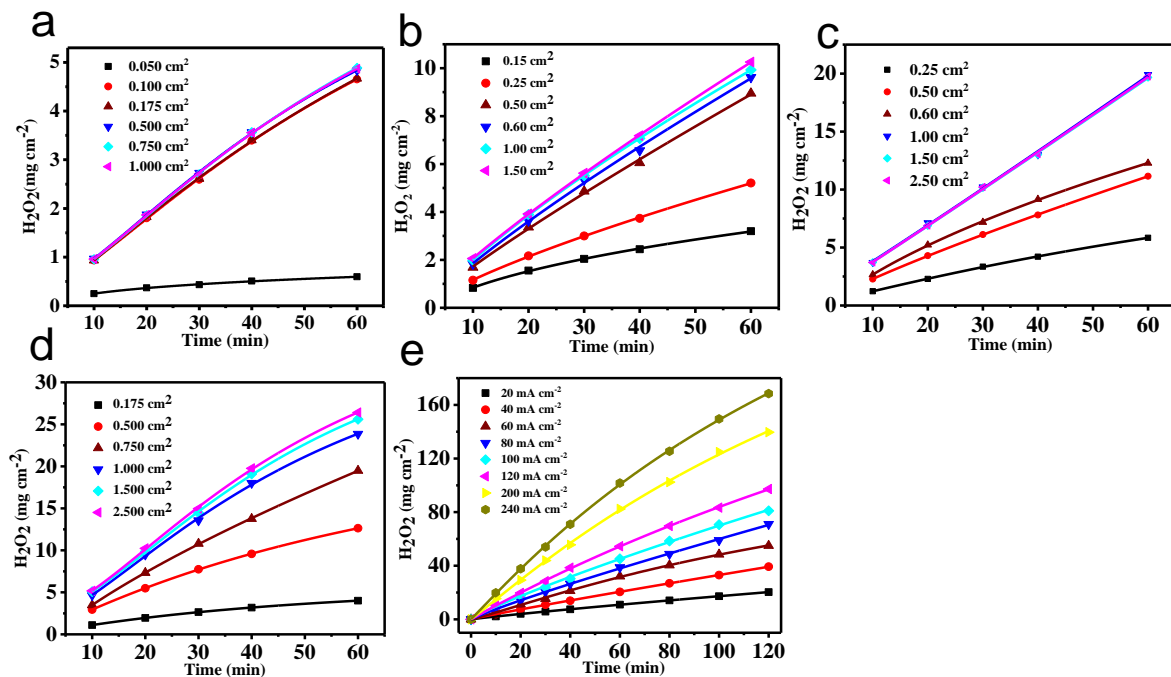

**Supplementary Figure 17.** The production of  $H_2O_2$  with different oxygen diffusion areas under the current density of (a)  $10 \text{ mA cm}^{-2}$ , (b)  $20 \text{ mA cm}^{-2}$ , (c)  $40 \text{ mA cm}^{-2}$  and (d)  $60 \text{ mA cm}^{-2}$ ; (e) the  $H_2O_2$  production of NADE under different current densities. Source data are provided as a Source Data file.

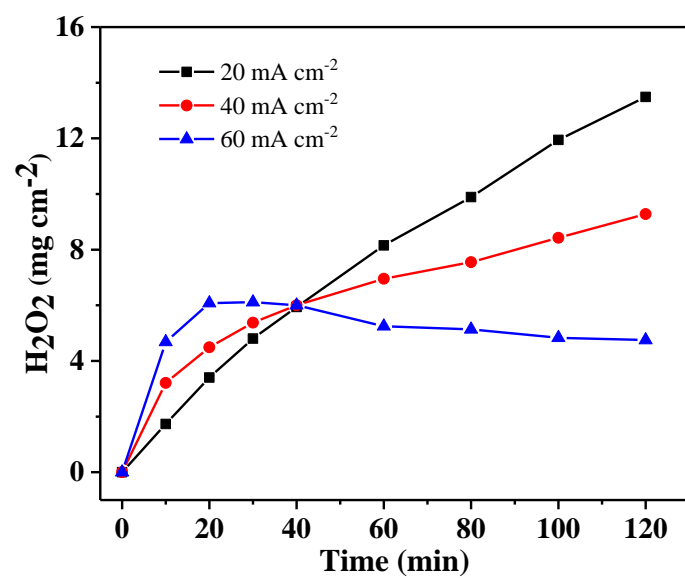

**Supplementary Figure 18.** H<sub>2</sub>O<sub>2</sub> concentration produced as a function of time for normal GDE without pumping air at constant current. Source data are provided as a Source Data file.

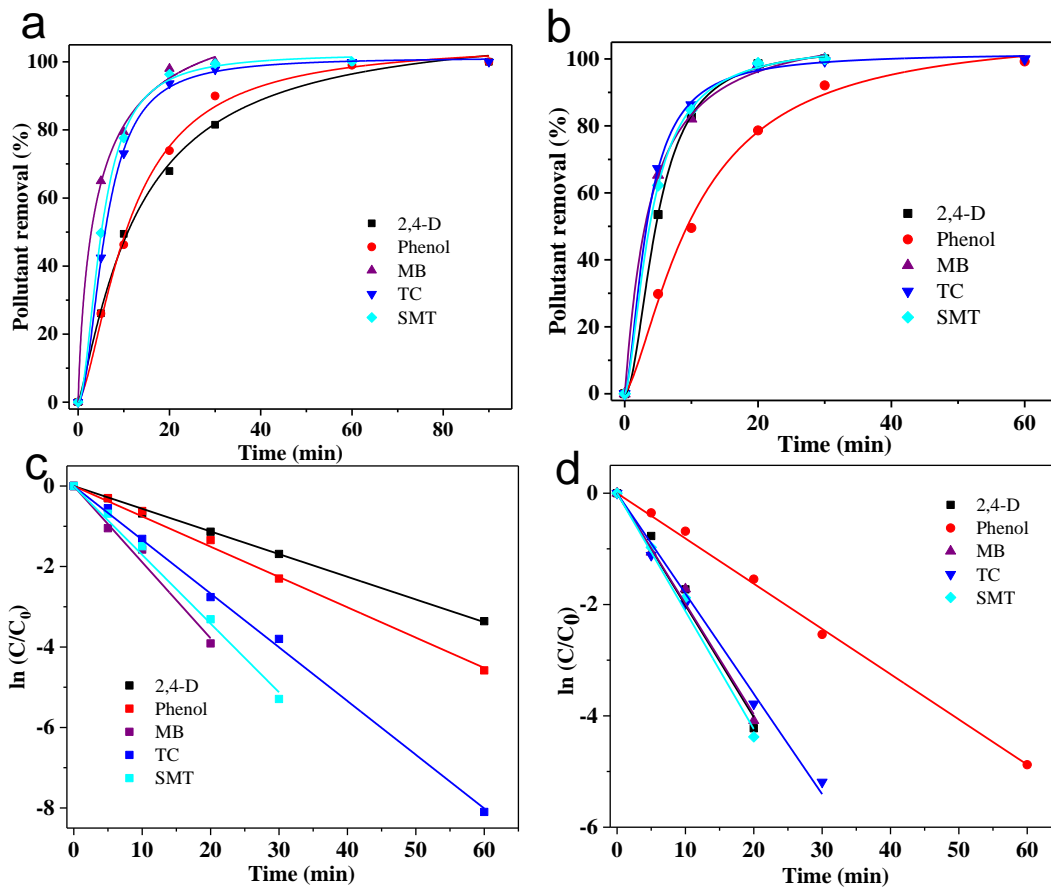

**Supplementary Figure 19.** The different organic pollutants removal in (a); (c) EF and (b); (d) PEF processes with the NADE. Source data are provided as a Source Data file.

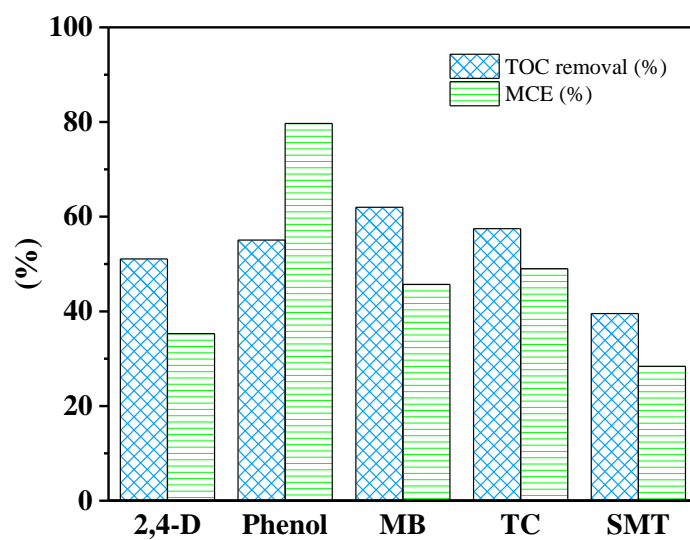

**Supplementary Figure 20.** TOC removal and MCE of different pollutants in EF process with the NADE; current density of  $20 \text{ mA cm}^{-2}$ ,  $0.5 \text{ mM Fe}^{2+}$  as catalyst. Source data are provided as a Source Data file.

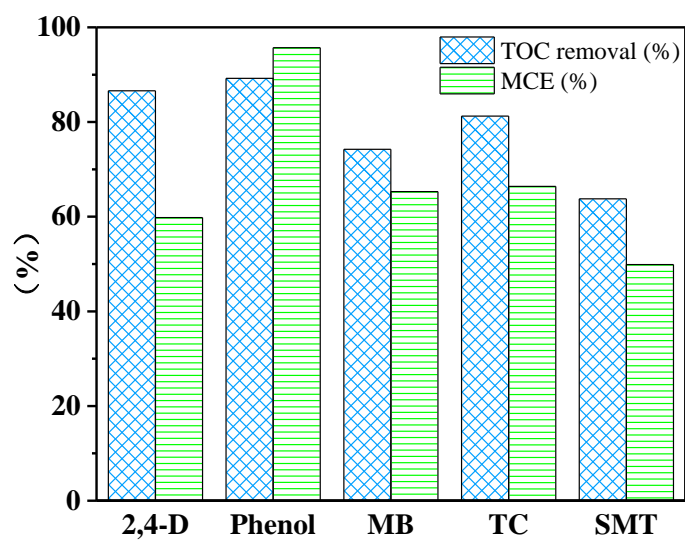

**Supplementary Figure 21.** TOC removal and MCE of different pollutants in PEF process with NADE; current density of  $20 \text{ mA cm}^{-2}$ ,  $0.5 \text{ mM Fe}^{2+}$  as catalyst. Source data are provided as a Source Data file.

## Supplementary Tables

**Supplementary Table 1.** BET surface area ( $S_{\text{BET}}$ ), micropore area ( $S_{\text{micro}}$ ), total pore volume ( $V_{\text{tot}}$ ), and pore size of catalytic layer materials with different PTFE/CB mass ratio.

|                                                    | 0.1    | 0.3    | 0.6   | 1.0    | 1.5    |
|----------------------------------------------------|--------|--------|-------|--------|--------|
| $S_{\text{BET}}$ ( $\text{m}^2 \text{g}^{-1}$ )    | 171.34 | 144.68 | 95.41 | 66.30  | 43.85  |
| $S_{\text{micro}}$ ( $\text{m}^2 \text{g}^{-1}$ )  | 61.14  | 42.46  | 9.10  | 4.97   | 4.46   |
| $V_{\text{tot}}$ ( $\text{cm}^3 \text{g}^{-1}$ )   | 0.37   | 0.34   | 0.30  | 0.23   | 0.17   |
| $V_{\text{micro}}$ ( $\text{cm}^3 \text{g}^{-1}$ ) | 0.03   | 0.02   | 0.003 | 0.0007 | 0.0004 |
| Pore size (nm)                                     | 15.62  | 15.82  | 18.06 | 18.56  | 19.50  |

**Supplementary Table 2.** Linear fit equations and exchange current densities calculated from the linear region of the Tafel plots.

| PTFE/CB ratio | Fit linear equation       | $10^{-6} j_0$ (A cm <sup>-2</sup> ) |
|---------------|---------------------------|-------------------------------------|
| 1.5           | $y = -6.79547 + 1.035x$   | 0.16                                |
| 1             | $y = -6.42836 + 4.74288x$ | 0.39                                |
| 0.6           | $y = -6.10879 + 4.74288x$ | 0.79                                |
| 0.4           | $y = -4.89066 + 4.74288x$ | 12.9                                |
| 0.1           | $y = -3.70859 + 4.74288x$ | 194.9                               |

**Supplementary Table 3.** The comparison with the performance of H<sub>2</sub>O<sub>2</sub> production under different current densities.

| Current density (mA cm <sup>-2</sup> ) | H <sub>2</sub> O <sub>2</sub> generation rate (mg h <sup>-1</sup> cm <sup>-2</sup> ) | CE (%) | EEC (kWh kg <sub>H<sub>2</sub>O<sub>2</sub></sub> <sup>-1</sup> ) | References   |
|----------------------------------------|--------------------------------------------------------------------------------------|--------|-------------------------------------------------------------------|--------------|
| 20                                     | 10.97                                                                                | 86.5   | 4.6                                                               | This work    |
| 60                                     | 32.09                                                                                | 81.8   | 6.9                                                               | This work    |
| 120                                    | 54.53                                                                                | 71.2   | 12.9                                                              | This work    |
| 200                                    | 84.37                                                                                | 66.9   | 18.9                                                              | This work    |
| 240                                    | 100.67                                                                               | 64.8   | 19.4                                                              | This work    |
| 107                                    | 10.7                                                                                 | 17     | 13.2                                                              | <sup>1</sup> |
| 217                                    | 38.33                                                                                | 28     | 11.3                                                              | <sup>1</sup> |
| 275                                    | 40                                                                                   | 23     | 20.4                                                              | <sup>1</sup> |
| 145                                    | 26.69                                                                                | 29     | -                                                                 | <sup>2</sup> |



**Supplementary Table 4.** The comparison with the performance of H<sub>2</sub>O<sub>2</sub> production in literatures.

| Cathode | Experimental conditions                                                                                                                            | Oxygen pumping volume                   | H <sub>2</sub> O <sub>2</sub> generation rate (mg h <sup>-1</sup> cm <sup>-2</sup> ) | EEC (kWh kg <sub>H<sub>2</sub>O<sub>2</sub></sub> <sup>-1</sup> ) | Energy consumption of Aeration (kWh kg <sub>H<sub>2</sub>O<sub>2</sub></sub> <sup>-1</sup> ) | OE (%)    | CE (%) | References   |
|---------|----------------------------------------------------------------------------------------------------------------------------------------------------|-----------------------------------------|--------------------------------------------------------------------------------------|-------------------------------------------------------------------|----------------------------------------------------------------------------------------------|-----------|--------|--------------|
| GDE     | Cathode area 6.15 cm <sup>2</sup> , V 250 mL, pH 3, 0.05 M Na <sub>2</sub> SO <sub>4</sub> , I 30 mA cm <sup>-2</sup>                              | 1.2 L min <sup>-1</sup> (air)           | 12.85                                                                                | –                                                                 | –                                                                                            | 0.37      | 50     | <sup>3</sup> |
| GDE     | Cathode area 100 cm <sup>2</sup> , V 25 L, pH 7, 0.05 M Na <sub>2</sub> SO <sub>4</sub> , I 65 mA cm <sup>-2</sup>                                 | 5 L min <sup>-1</sup> (air)             | 13.93                                                                                | 53.86                                                             | 1077                                                                                         | 1.59      | 33.8   | <sup>4</sup> |
| GDE     | Cathode area 3.4 cm <sup>2</sup> , V 400 mL, pH 2, 0.1 M K <sub>2</sub> SO <sub>4</sub> , E = -1.1 V vs. SCE                                       | 0.2 bar (O <sub>2</sub> )               | 1.12                                                                                 | 18.8                                                              | –                                                                                            | –         | –      | <sup>5</sup> |
| GDE     | Cathode area 20 cm <sup>2</sup> , V 1.5 L, pH 1, 0.1 M K <sub>2</sub> SO <sub>4</sub> & 0.1 M H <sub>2</sub> SO <sub>4</sub> , E = -2.25 V vs. SCE | –                                       | 15.52                                                                                | 22.1                                                              | –                                                                                            | –         | –      | <sup>6</sup> |
| GDE     | Cathode area 3.1 cm <sup>2</sup> , V 100 mL, pH 3, 0.05 M Na <sub>2</sub> SO <sub>4</sub> , I 145 mA cm <sup>-2</sup>                              | 2 L min <sup>-1</sup> (O <sub>2</sub> ) | 26.69                                                                                | –                                                                 | –                                                                                            | 4.90      | 29     | <sup>2</sup> |
| GDE     | Cathode area 4 cm <sup>2</sup> , V 200 mL, pH 3, 0.05 M Na <sub>2</sub> SO <sub>4</sub> , I 20 mA cm <sup>-2</sup>                                 | 2 L min <sup>-1</sup> (air)             | 11.78                                                                                | –                                                                 | –                                                                                            | 0.13      | 93     | <sup>7</sup> |
| GDE     | Cathode area 7×2 cm <sup>2</sup> , V 200 mL, pH 7, 0.05 M Na <sub>2</sub> SO <sub>4</sub> , I 35.7 mA cm <sup>-2</sup>                             | 0.5 L min <sup>-1</sup> (air)           | 12.16                                                                                | 15.9                                                              | 58.8                                                                                         | 1.93      | 51–88  | <sup>8</sup> |
| GDE     | Cathode area 7×2 cm <sup>2</sup> , V 200 mL, pH 7, 0.05 M Na <sub>2</sub> SO <sub>4</sub> , I 35.7 mA cm <sup>-2</sup>                             | 0.1 L min <sup>-1</sup> (air)           | 11.16                                                                                | 17.9                                                              | 64.1                                                                                         | 8.84      | 45–84  | <sup>8</sup> |
| NADE    | Cathode area 5 cm <sup>2</sup> , V 250 mL, pH 7, 0.05 M Na <sub>2</sub> SO <sub>4</sub> , I 20 mA cm <sup>-2</sup>                                 | 0                                       | 10.97                                                                                | 4.55                                                              | 0                                                                                            | 44.5–64.9 | 86.5   | Present work |
| NADE    | Cathode area 5 cm <sup>2</sup> , V 250 mL, pH 7, 0.05 M Na <sub>2</sub> SO <sub>4</sub> , I 60 mA cm <sup>-2</sup>                                 | 0                                       | 30.93                                                                                | 6.92                                                              | 0                                                                                            | 44.5–64.9 | 81.82  | Present work |
| NADE    | Cathode area 5 cm <sup>2</sup> , V 250 mL, pH 7, 0.05 M Na <sub>2</sub> SO <sub>4</sub> , I 240 mA cm <sup>-2</sup>                                | 0                                       | 101.67                                                                               | 19.35                                                             | 0                                                                                            | 44.5–64.9 | 66.79  | Present work |

**Supplementary Table 5.** The comparison of energy consumption of TOC removal with literatures.

| Metho<br>d | Electrode<br>(anode/cathode)                                                 | Experimental conditions                                                                                                                                                                | Pollutant<br>degradation | TOC<br>removal | EEC (kWh<br>kgTOC <sup>-1</sup> ) | References |
|------------|------------------------------------------------------------------------------|----------------------------------------------------------------------------------------------------------------------------------------------------------------------------------------|--------------------------|----------------|-----------------------------------|------------|
| PEF        | Pt/GDE                                                                       | 350 mL of 100 mg L <sup>-1</sup> phenol, 0.1 M H <sub>2</sub> SO <sub>4</sub> and 0.1 M K <sub>2</sub> SO <sub>4</sub> , 3 mM Fe <sup>2+</sup> , 0.2 bar (O <sub>2</sub> )             | 65%, 2 h                 | 11%            | -                                 | 9          |
| PEF        | Graphite/MesoC<br>/GF                                                        | 70 mL of 50 mg L <sup>-1</sup> phenol, 0.05 M Na <sub>2</sub> SO <sub>4</sub> , pH=3, 50 mL min <sup>-1</sup> (O <sub>2</sub> )                                                        | 100%, 3 h                | 85% (COD)      | -                                 | 10         |
| SPEF       | BDD/GDE                                                                      | 2.5L of 0.28 mM bronopol, 0.05 M Na <sub>2</sub> SO <sub>4</sub> , pH=3, 0.5 mM Fe <sup>2+</sup> , 8.6 kPa (Air)                                                                       | 100%, 6 h                | 94%            | 3900                              | 11         |
| EF         | Pt/Gr-Brush                                                                  | 400 mL of 0.33 mM phenol, 0.05 M K <sub>2</sub> SO <sub>4</sub> , pH=3, 0.1 mM Fe <sup>2+</sup> , 0.2 L min <sup>-1</sup> (Air)                                                        | 99%, 2 h                 | 40%,           | 100                               | 12         |
| SPEF       | BDD/GDE                                                                      | 75 L of 50 mg L <sup>-1</sup> pyrimethanil and 90 mg L <sup>-1</sup> methomyl, 0.05 M Na <sub>2</sub> SO <sub>4</sub> , pH=3, 0.5 mM Fe <sup>2+</sup> , 10 L min <sup>-1</sup> (Air)   | 70-77%, 2 h              | 15%            | 938                               | 4          |
| EF         | Pt/GDE                                                                       | 2.5 L of 92 mg L <sup>-1</sup> 2,4-D, 0.05 M Na <sub>2</sub> SO <sub>4</sub> , pH=3, 0.5 mM Fe <sup>2+</sup> , 8.6 kPa (Air)                                                           | -                        | 59%, 5 h       | 420                               | 13         |
| EF         | BDD/GDE                                                                      | 350mL of 91.23 mg L <sup>-1</sup> Orange II, 0.1 M H <sub>2</sub> SO <sub>4</sub> and 0.1 M K <sub>2</sub> SO <sub>4</sub> , pH=3, 0.5 mM Fe <sup>2+</sup> , 0.2 bar (O <sub>2</sub> ) | 69%, 2 h                 | -              | -                                 | 14         |
| EF         | DSA/Fe@PTFE<br>/MWCNT-MF                                                     | 100 mL of 10.0 mg L <sup>-1</sup> MB, 0.05 M Na <sub>2</sub> SO <sub>4</sub> , pH=3, 0.5 L min <sup>-1</sup> (Air)                                                                     | 100%, 1 h                | 78.4%          | -                                 | 15         |
| EF         | Ti <sub>4</sub> O <sub>7</sub> /Fe <sup>II</sup> Fe <sup>III</sup><br>LDH/CF | 145 mL of 50.7 mg L <sup>-1</sup> SMT, 0.05 M Na <sub>2</sub> SO <sub>4</sub> , pH=3, 1 L min <sup>-1</sup> (Air)                                                                      | 100%, 40 min             | 97%, 8 h       | -                                 | 16         |
| EF         | BDD/CF                                                                       | 230 mL of 89 mg L <sup>-1</sup> TC, 0.05 M Na <sub>2</sub> SO <sub>4</sub> , pH=5.94, 1.0 g L <sup>-1</sup> chalcopyrite, 1 L min <sup>-1</sup> (Air)                                  | 100%, 10 min             | 98%, 6 h       | -                                 | 17         |
| EF         | DSA/NADE                                                                     | 250 mL of 100 mg L <sup>-1</sup> 2,4-D, 0.05 M Na <sub>2</sub> SO <sub>4</sub> , pH=3, 0.5 mM Fe <sup>2+</sup>                                                                         | 100%, 1.5 h              | 51.1%          | 66.4                              | This work  |
| EF         | DSA/NADE                                                                     | 250 mL of 100 mg L <sup>-1</sup> phenol, 0.05 M Na <sub>2</sub> SO <sub>4</sub> , pH=3, 0.5 mM Fe <sup>2+</sup>                                                                        | 100%, 1.5 h              | 55.1%          | 36.6                              | This work  |
| EF         | DSA/NADE                                                                     | 250 mL of 100 mg L <sup>-1</sup> MB, 0.05 M Na <sub>2</sub> SO <sub>4</sub> , pH=3, 0.5 mM Fe <sup>2+</sup>                                                                            | 100%, 1 h                | 62%            | 65.8                              | This work  |
| EF         | DSA/NADE                                                                     | 250 mL of 100 mg L <sup>-1</sup> SMT, 0.05 M Na <sub>2</sub> SO <sub>4</sub> , pH=3, 0.5 mM Fe <sup>2+</sup>                                                                           | 100%, 1 h                | 39.5%          | 91.7                              | This work  |
| EF         | DSA/NADE                                                                     | 250 mL of 100 mg L <sup>-1</sup> TC, 0.05 M Na <sub>2</sub> SO <sub>4</sub> , pH=3, 0.5 mM Fe <sup>2+</sup>                                                                            | 100%, 1 h                | 57.5%          | 52.7                              | This work  |

## Supplementary References

1. Barros, W. R. P., Ereno, T., Tavares, A. C. & Lanza, M. R. V. In situ electrochemical generation of hydrogen peroxide in alkaline aqueous solution by using an unmodified gas diffusion electrode. *ChemElectroChem* **2**, 714-719 (2015).
2. Brillas, E., Calpe, J. C. & Casado, J. Mineralization of 2,4-D by advanced electrochemical oxidation processes. *Water Res.* **34**, 2253-2262 (2000).
3. Panizza, M. & Cerisola, G. Electrochemical generation of H<sub>2</sub>O<sub>2</sub> in low ionic strength media on gas diffusion cathode fed with air. *Electrochim. Acta* **54**, 876-878 (2008).
4. Salmeron, I. et al. Optimization of electrocatalytic H<sub>2</sub>O<sub>2</sub> production at pilot plant scale for solar-assisted water treatment. *Appl. Catal. B* **242**, 327-336 (2019).
5. Carneiro, J. F., Rocha, R. S., Hammer, P., Bertazzoli, R. & Lanza, M. R. V. Hydrogen peroxide electrogeneration in gas diffusion electrode nanostructured with Ta<sub>2</sub>O<sub>5</sub>. *Appl. Catal. A* **517**, 161-167 (2016).
6. Reis, R. M. et al. Use of gas diffusion electrode for the in situ generation of hydrogen peroxide in an electrochemical flow-by reactor. *Ind. Eng. Chem. Res.* **51**, 649-654 (2012).
7. Sheng, Y. et al. Electrogeneration of hydrogen peroxide on a novel highly effective acetylene black-PTFE cathode with PTFE film. *Electrochim Acta* **56**, 8651-8656 (2011).
8. Yu, X., Zhou, M., Ren, G. & Ma, L. A novel dual gas diffusion electrodes system for efficient hydrogen peroxide generation used in electro-Fenton. *Chem. Eng. J.* **263**, 92-100 (2015).
9. Assumpcao, M. H. M.T. et al. Low tungsten content of nanostructured material supported on carbon for the degradation of phenol. *Appl. Catal. B* **142**, 479-486 (2013).
10. Yue, D. et al. A metal-free visible light active photo-electro-Fenton-like cell for organic pollutants degradation. *Appl. Catal. B* **229**, 211-217 (2018).
11. Ye, Z., Guelfi, D. R. V., Alvarez, G., Alcaide, F., Brillas, E. & Sires, I. Enhanced electrocatalytic production of H<sub>2</sub>O<sub>2</sub> at Co-based air-diffusion cathodes for the photoelectro-Fenton treatment of bronopol. *Appl. Catal. B* **247**, 191-199 (2019).
12. Mousset, E., Wang, Z., Hammaker, J. & Lefebvre, O. Electrocatalytic phenol degradation by a novel nanostructured carbon fiber brush cathode coated with graphene ink. *Electrochim. Acta* **258**, 607-617 (2017).
13. Garcia, O., Isarain-Chavez, E., El-Ghenmy, A., Brillas, E. & Peralta-Hernandez, J. M. Degradation of 2,4-D herbicide in a recirculation flow plant with a Pt/air-diffusion and a BDD/BDD cell by electrochemical oxidation and electro-Fenton process. *J. Electroanal. Chem.* **728**, 1-9 (2014).
14. Paz, E. C. et al. Evaluation of H<sub>2</sub>O<sub>2</sub> electrogeneration and decolorization of Orange II azo dye using tungsten oxide nanoparticle-modified carbon. *Appl. Catal. B* **232**, 436-445 (2018).
15. Zhang, Y. et al. Design of a novel and efficient electro-Fenton cathode with skeleton of melamine foams. *Mater. Lett.* **239**, 196-199 (2019).
16. Ganiyu, S. O. et al. Electrochemical mineralization of sulfamethoxazole over wide pH range using (FeFeIII)-Fe-II LDH modified carbon felt cathode: Degradation pathway, toxicity and reusability of the modified cathode. *Chem. Eng. J.* **350**, 844-855 (2018).
17. Barhoumi, N. et al. Kinetics of oxidative degradation/mineralization pathways of the antibiotic tetracycline by the novel heterogeneous electro-Fenton process with solid catalyst chalcopyrite. *Appl. Catal. B* **209**, 637-647 (2017).
